# Supplementary material
Source: PubMed Central journal article supplement (PMC5350615)
Supplement: NIHMS771694-supplement-supp_info.pdf [file NIHMS771694-supplement-supp_info.pdf]

## Statistical details

### Figure 1

**d** (top), rank-sum test for each group,  $N = 22155$ ,  $P = 3.2 \times 10^{-8}$  (RF),  $P = 4.1 \times 10^{-31}$  (ON),  $P = 5.7 \times 10^{-26}$  (OFF),  $P = 9.2 \times 10^{-12}$  (Same),  $P = 8.5 \times 10^{-15}$  (Dif). **d** (bottom), Kruskal-Wallis test,  $N = 8$ ,  $P = 6.1 \times 10^{-21}$ , *post hoc* using Dunn's method: except RF-Same comparison  $P = 0.0725$ , the largest  $P$  value among the rest of pairwise comparison is  $7.9 \times 10^{-3}$ . Data from 8 fields of view (7 animals).

### Figure 2

**d**, linear regression,  $N = 211$ ,  $P = 1.4 \times 10^{-10}$  (RF),  $P = 9.9 \times 10^{-24}$  (OFF),  $P = 0.535$  (ON). **e** (left), Kruskal-Wallis test,  $N = 16$ ,  $P = 7.6 \times 10^{-12}$ , *post hoc* using Dunn's method:  $P = 1.4 \times 10^{-7}$  (ON-OFF),  $P = 9.9 \times 10^{-5}$  (OFF-RF),  $P = 3.9 \times 10^{-5}$  (ON-RF). **e** (right), Kruskal-Wallis test,  $N = 16$ ,  $P = 8.5 \times 10^{-15}$ , *post hoc* using Dunn's method:  $P = 9.5 \times 10^{-8}$  (ON-OFF),  $P = 7.4 \times 10^{-5}$  (OFF-RF),  $P = 4.5 \times 10^{-6}$  (ON-RF). Data from 8 fields of view (7 animals).

### Figure 3

**a**, circular correlation,  $N = 176$ ,  $P = 1.7 \times 10^{-5}$ . Data from 4 fields of view (2 animals). **c**, circular correlation,  $N = 73$ ,  $P = 6.9 \times 10^{-9}$ . **e**, mean values: 180.2 for relative phase, 2.89 for numbers of half-cycles within Gaussian envelop, -0.35 for logarithmic aspect ratio. **f**,  $N = 73$ ,  $P = 1.2 \times 10^{-9}$  (top, circular correlation),  $P = 3.3 \times 10^{-9}$  (middle, linear regression),  $P = 6.6 \times 10^{-6}$  (bottom, linear regression). Data from 6 fields of view (5 animals).

### Figure 4

**d** (top left), circular correlation,  $N = 381$ ,  $P = 2.1 \times 10^{-21}$ . **d** (top right), circular correlation,  $N = 18235$ ,  $P = 3.1 \times 10^{-29}$ . **d** (bottom), rank-sum test within group,  $N = 16$ ,  $P = 4.2 \times 10^{-13}$  (2P);  $N = 12$ ,  $P = 2.8 \times 10^{-10}$  (Epi). Data from 6 fields of view (4 animals). **E**, Rayleigh test,  $N = 17389$ ,  $P = 5.2 \times 10^{-16}$  (top);  $N = 38232$ ,  $P = 0.223$  (middle);  $N = 37898$ ,  $P = 0.643$  (bottom). Data from 6 fields of view (6 animals).

### Extended figure 1

**i-l**,  $N = 143$ , Data from 3 fields of view (3 animals).

### Extended figure 3

**b** (bottom), Wilcoxon rank-sum test,  $N = 21$ ,  $P = 9.6 \times 10^{-5}$ . Data from 4 fields of view (4 animals).

### Extended figure 4

**b** (bottom), Kruskal-Wallis test,  $N = 8$ ,  $P = 3.2 \times 10^{-17}$ , *post hoc* using Dunn's method: the largest  $P$  value among pairwise comparison is  $8.2 \times 10^{-3}$ . **d** (left), linear regression,  $N = 145$ ,  $P = 0.057$  (ON);  $N = 277$ ,  $P = 2.4 \times 10^{-76}$  (OFF). **d** (middle), rank-sum test,  $N = 16$ ,  $P = 4.7 \times 10^{-9}$ . **d** (right), rank-sum test,  $N = 16$ ,  $P = 8.1 \times 10^{-13}$ . **e** (right), circular correlation,  $N = 68$ ,  $P = 9.51 \times 10^{-3}$  (ON);  $N = 89$ ,  $P = 0.586$  (OFF). Data from 8 fields of view (7 animals).

### Extended figure 5

**c** (top), linear regression,  $N = 1811$ ,  $P = 0.082$ ; (bottom), linear regression,  $N = 1811$ ,  $P = 0.096$ . Data from 8 fields of view (7 animals).

Extended figure 7

**b**, circular correlation,  $N = 179$ ,  $P = 1.8 \times 10^{-18}$ . Data from 5 fields of view (2 animals). **c**, circular correlation,  $N = 73$ ,  $P = 1.7 \times 10^{-10}$ . Data from 6 fields of view (5 animals). **e**, circular correlation,  $N = 56521$ ,  $P = 6.6 \times 10^{-36}$  (left),  $P = 0.245$  (middle). **e** (right), rank-sum test,  $N = 36$ ,  $P = 8.2 \times 10^{-18}$ . Data from 5 fields of view (2 animals). **g** (left top), Kruskal-Wallis test  $N = 32$ ,  $P = 1.2 \times 10^{-25}$ , *post hoc* using Dunn's method: largest  $P$  value is  $3.1 \times 10^{-3}$ . **g** (left bottom), Kruskal-Wallis test  $N = 32$ ,  $P = 7.9 \times 10^{-15}$ , *post hoc* using Dunn's method: largest  $P$  value is 0.023. Data from 6 fields of view (6 animals).
